# Supplementary material for: TRIM5α Restriction of HIV-1-N74D Viruses in Lymphocytes Is Caused by a Loss of Cyclophilin A Protection
Source: MDPI journal article supplement (doi:10.3390/v14020363), 2022-02-10
Supplement: s1 [file s1]

**Table S1. X-ray data collection and refinement statistics for the full-length N74D HIV-1 CA apo and PF74 complex crystal structures.**

|                                     | <b><u>N74D CA apo</u></b>     | <b><u>N74D CA/PF74</u></b>    |
|-------------------------------------|-------------------------------|-------------------------------|
|                                     | PDB ID: 7MN0                  | PDB ID: 7MKC                  |
| <b><u>Data collection</u></b>       | Beamline ALS 4.2.2            | Beamline APS 23-ID-D          |
| Wavelength (Å)                      | 1.000030                      | 1.03317                       |
| Resolution (Å)                      | 2.90 (2.90-3.08) <sup>a</sup> | 2.65 (2.65-2.81) <sup>a</sup> |
| Space group                         | P6                            | P6                            |
| Cell dimensions                     |                               |                               |
| a, c (Å)                            | 91.7, 57.2                    | 90.4, 55.7                    |
| Observed reflections                | 69,089                        | 41,748                        |
| Unique reflections                  | 6,190                         | 7,562                         |
| Redundancy                          | 11.1 (10.6)                   | 5.5 (5.3)                     |
| Completeness (%)                    | 99.8 (99.4)                   | 98.3 (96.9)                   |
| R <sub>meas</sub> <sup>b</sup>      | 0.129 (1.22)                  | 0.100 (0.82)                  |
| CC <sub>1/2</sub>                   | 99.9 (71.5)                   | 99.8 (68.8)                   |
| Avg I/σ                             | 16.3 (2.0)                    | 11.4 (2.0)                    |
| <b><u>Refinement statistics</u></b> |                               |                               |
| Resolution (Å)                      | 45.87-2.90                    | 45.38-2.65                    |
| No. of reflections (working)        | 5,866                         | 7,190                         |
| No. of reflections (test)           | 323                           | 366                           |
| R <sub>work</sub> <sup>c</sup>      | 0.219                         | 0.183                         |
| R <sub>free</sub> <sup>d</sup>      | 0.274                         | 0.242                         |
| Overall B value (Å <sup>2</sup> )   | 84.0                          | 67.0                          |
| Wilson B value (Å <sup>2</sup> )    | 70.1                          | 60.0                          |
| Ramachandran plot (%) <sup>e</sup>  |                               |                               |
| Favored                             | 93.4                          | 94.5                          |
| Allowed                             | 6.6                           | 5.5                           |
| Disallowed                          | 0                             | 0                             |
| All-atom clashscore                 | 4                             | 3                             |
| RMSD Bond length (Å)                | 0.019                         | 0.019                         |
| RMSD Angle (°)                      | 1.904                         | 1.960                         |

<sup>a</sup> Values in parentheses are for the outer resolution shell.

$$^b R_{\text{meas}} = \frac{\sum_{hkl} \sqrt{\frac{n}{n-1}} \sum_{j=1}^n |I_{hkl,j} - \langle I_{hkl} \rangle|}{\sum_{hkl} \sum_j I_{hkl,j}}$$

$$^c R_{\text{work}} = \frac{\sum_{hkl} |F_{\text{obs}} - F_{\text{calc}}|}{\sum_{hkl} |F_{\text{obs}}|}$$

<sup>d</sup> R<sub>free</sub> = R<sub>work</sub>, except 5% of the data excluded from the refinement.

<sup>e</sup> Evaluated by MolProbity (Chen *et al.*, *Acta Cryst.* D66, 2010, 12-21).

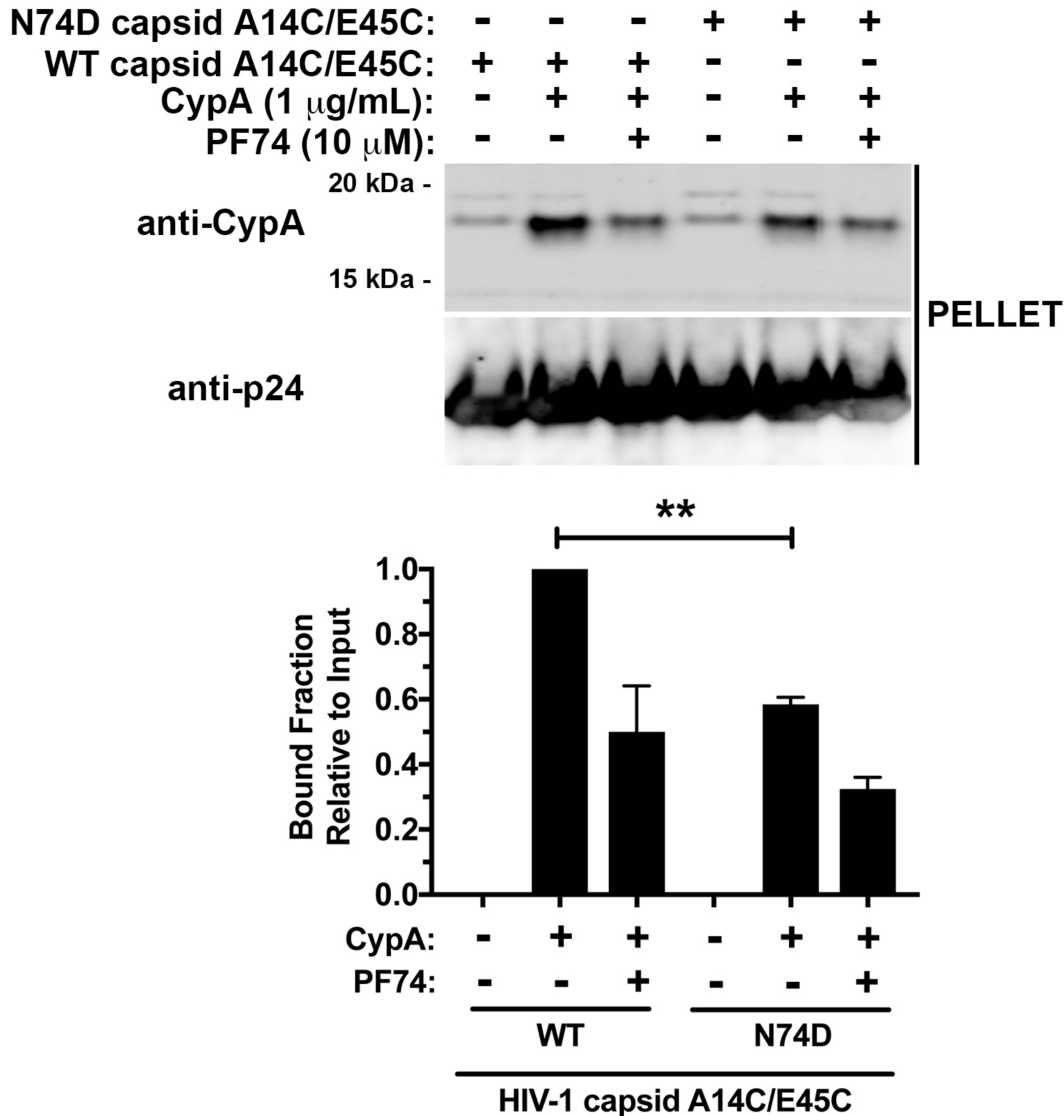

**Figure S1. Recombinant CypA binds with decrease affinity to N74D-stabilized capsid tubes.** Recombinant CypA protein was diluted in capsid binding buffer (CBB) to a final concentration of 1  $\mu$ g/mL. 40  $\mu$ L of this mixture were mixed with Laemmli buffer and used as INPUT (not shown). 300  $\mu$ L of this mixture were mixed with 10  $\mu$ L of either stabilized wild-type, or N74D capsid tubes (5 mg/ml) in presence of PF74 (10  $\mu$ M) or DMSO. Mixtures were incubated for 1 h at room temperature. Stabilized HIV-1 capsid tubes were collected by centrifugation and washed twice using CBB. Pellets were resuspended in 1 $\times$  Laemmli buffer (BOUND) and then analyzed by western blotting using anti-Cyp A and anti-p24 antibodies. Experiments were repeated three times, and a representative experimental result is shown. The BOUND fraction relative to the INPUT fraction for three independent experiments (with standard deviation) is shown. \*\* indicates P-value < 0.001 as determined by using the unpaired t-test.
